# Supplementary material for: Lactonase-expressing Lactobacillus plantarum NC8 attenuates the virulence factors of multiple drug resistant Pseudomonas aeruginosa in co-culturing environment
Source: Springer Nature journal article supplement (doi:10.1007/s11274-014-1645-9), 2014-03-26
Supplement: 11274_2014_1645_MOESM1_ESM.pdf [file 11274_2014_1645_MOESM1_ESM.pdf]

## Supplementary Material

### **Lactonase-expressing *Lactobacillus plantarum* NC8 attenuates the virulence factors of multiple drug resistant *Pseudomonas aeruginosa* in co-culturing environment**

Sudha Joshi <sup>1</sup>, Amanjot Kaur <sup>1</sup>, Prince Sharma <sup>2</sup>, Kusum Harjai <sup>2</sup> and Neena Capalash <sup>1\*</sup>

1. Department of Biotechnology, Panjab University, Chandigarh 160014, India.

2. Department of Microbiology, Panjab University, Chandigarh 160014, India.

Email addresses: dsusiin@gmail.com ; kauramanjot86@yahoo.com ; princess@pu.ac.in ; kusum\_harjai@hotmail.com ; caplash@pu.ac.in

\*Corresponding author:

Neena Capalash

Department of Biotechnology,

Panjab University, Chandigarh 160014, India

Email address: [caplash@pu.ac.in](mailto:caplash@pu.ac.in)

Telephone: +91-0172-2534085

Fax: +91-0172-2541409

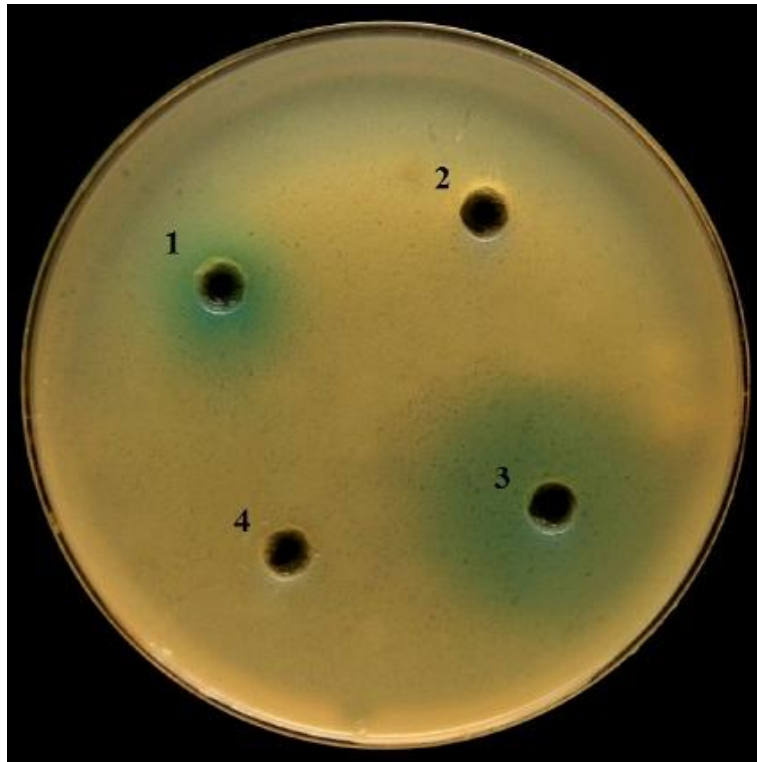

**Fig. S1** Plate bioassay showing the effect of recombinant *L. plantarum* NC8 on AHLs of *P. aeruginosa* PAO1 using *A. tumefaciens* NT1 as the indicator strain.

Well 1: AHL extracted from untreated *P. aeruginosa* PAO1; Well 2: AHLs extracted from *P. aeruginosa* PAO1 co-cultured with recombinant *L. plantarum* NC8; Well 3: 1 $\mu$ M oxo-C12-HSL in DMF as positive control; Well 4: DMF (control).

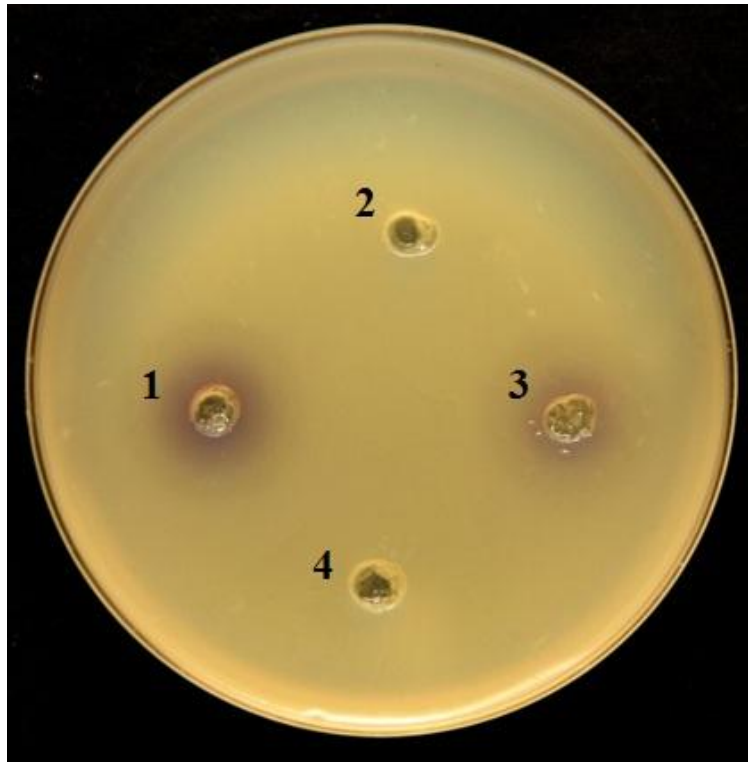

**Fig. S2** Plate bioassay showing the effect of recombinant *L. plantarum* NC8 on C4-HSL extracted from *P. aeruginosa* PAO1 co-cultured with recombinant *L. plantarum* NC8 using *C. violaceum* CV026 as the indicator strain.

Well 1: AHLs extracted from untreated *P. aeruginosa* PAO1; Well 2: AHLs extracted from *P. aeruginosa* PAO1 co-cultured with recombinant *L. plantarum* NC8; Well 3: 100 $\mu$ M C4-HSL in DMF as positive control; Well 4: DMF (control).
